# Supplementary material for: Model-driven design allows growth of Mycoplasma pneumoniae on serum-free media
Source: PubMed Central journal article supplement (PMC7584665; doi:10.1038/s41540-020-00153-7), 2020-10-23
Supplement: 41540_2020_153_MOESM1_ESM.pdf [file 41540_2020_153_MOESM1_ESM.pdf]

## **Model-driven design allows growth of *Mycoplasma pneumoniae* on serum-free media**

*Erika Gaspari*<sup>\*1§</sup>, *Antoni Malachowski*<sup>1§</sup>, *Luis Garcia-Morales*<sup>2†</sup>, *Raul Burgos*<sup>3</sup>, *Luis Serrano*<sup>3,4,5</sup>, *Vitor A. P. Martins dos Santos*<sup>1,6</sup>, and *Maria Suarez-Diez*<sup>\*1</sup>

1. Laboratory of Systems and Synthetic Biology, Wageningen University & Research, Wageningen, the Netherlands
2. INRA, UMR 1332 de Biologie du Fruit et Pathologie , F-33140 Villenave d'Ornon , France
3. Centre for Genomic Regulation (CRG), The Barcelona Institute for Science and Technology, Doctor Aiguader 88, Barcelona, 08003, Spain
4. Universitat Pompeu Fabra (UPF), Barcelona, Spain
5. Institució Catalana de Recerca i Estudis Avançats (ICREA), Pg. Lluís Companys 23, Barcelona, 08010, Spain
6. LifeGlimmer GmbH, MMarkelstrasse 38, Berlin, Germany

### **§ Equally contributing authors**

**† Present address:** Laboratory of Systems and Synthetic Biology, Wageningen University & Research, Wageningen, the Netherlands

### **\*Corresponding authors**

**Erika Gaspari**, MSc

[erika.gaspariwur@gmail.com](mailto:erika.gaspariwur@gmail.com)

**Maria Suarez-Diez**, PhD

[maria.suarezdiez@wur.nl](mailto:maria.suarezdiez@wur.nl)

## Supplementary Material

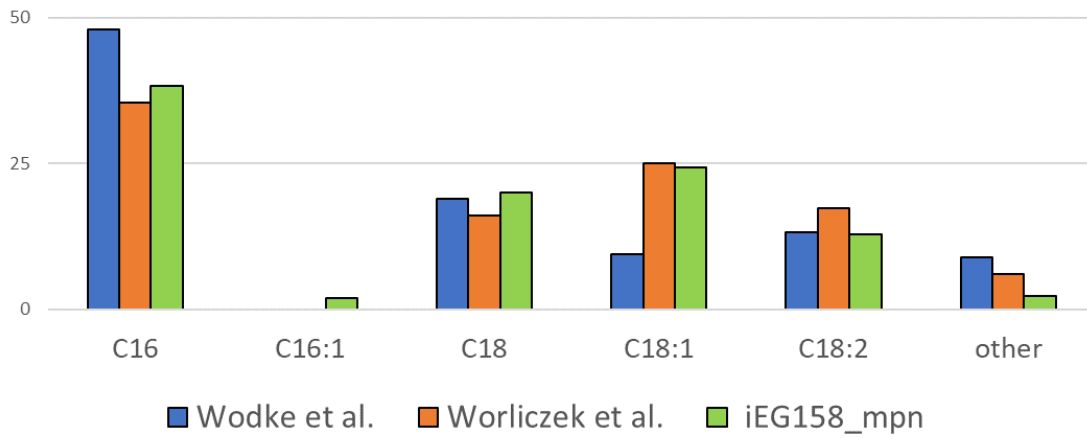

**Supplementary Figure S1.** *M. pneumoniae* fatty acids composition from different studies.

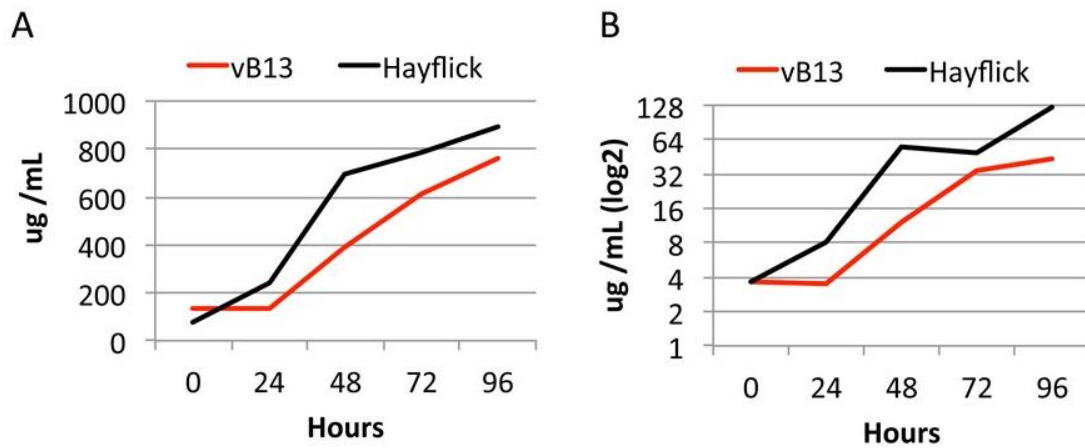

**Supplementary Figure S2.** Growth curve of *M. pneumoniae* in vB13 medium (defined, animal component-free) compared to Hayflick medium (serum-rich). Cell growth in 25cm<sup>2</sup> tissue culture flasks containing 5ml of medium was assessed by (A) protein and (B) DNA biomass quantification along 96h of culture.

**Supplementary Table S1.** Different proportions distributions of the lipid membrane composition of *M. pneumoniae* reconstructed from literature.

| Lipid                 | Min Fraction | Max Fraction | Acyl chain | Abs Fraction | Min Rel Fraction | Max Rel Fraction |
|-----------------------|--------------|--------------|------------|--------------|------------------|------------------|
| phosphatidylcholine   | 0,06         | 0,1          | C16        | 0,45         | 0,027            | 0,045            |
|                       |              |              | C16:1      | 0,0333       | 0,001998         | 0,00333          |
|                       |              |              | C18        | 0,45         | 0,027            | 0,045            |
|                       |              |              | C18:1      | 0,0333       | 0,001998         | 0,00333          |
|                       |              |              | C18:2      | 0,0334       | 0,002004         | 0,00334          |
| cardiolipin           | 0,15         | 0,25         | C16        |              |                  |                  |
|                       |              |              | C16:1      |              |                  |                  |
|                       |              |              | C18        |              |                  |                  |
|                       |              |              | C18:1      | 0,25         | 0,0375           | 0,0625           |
|                       |              |              | C18:2      | 0,75         | 0,1125           | 0,1875           |
| phosphatidic acid     | 0,12         | 0,2          | C16        | 0,75         | 0,09             | 0,15             |
|                       |              |              | C16:1      |              |                  |                  |
|                       |              |              | C18        |              |                  |                  |
|                       |              |              | C18:1      | 0,25         | 0,03             | 0,05             |
|                       |              |              | C18:2      |              |                  |                  |
| phosphatidyl glycerol | 0,09         | 0,15         | C16        | 0,75         | 0,0675           | 0,1125           |
|                       |              |              | C16:1      |              |                  |                  |
|                       |              |              | C18        |              |                  |                  |
|                       |              |              | C18:1      | 0,25         | 0,0225           | 0,0375           |
|                       |              |              | C18:2      |              |                  |                  |
| sphingomyelin         | 0,09         | 0,15         | C16        | 0,15         | 0,0135           | 0,0225           |
|                       |              |              | C16:1      | 0,05         | 0,0045           | 0,0075           |
|                       |              |              | C18        | 0,7          | 0,063            | 0,105            |
|                       |              |              | C18:1      | 0,05         | 0,0045           | 0,0075           |
|                       |              |              | C18:2      | 0,05         | 0,0045           | 0,0075           |
| glycolipids           | 0,06         | 0,1          | C16        | 0,75         | 0,045            | 0,075            |
|                       |              |              | C16:1      |              |                  |                  |
|                       |              |              | C18        |              |                  |                  |
|                       |              |              | C18:1      | 0,25         | 0,015            | 0,025            |
|                       |              |              | C18:2      |              |                  |                  |
| diacylglycerol        | 0,03         | 0,05         | C16        | 0,75         | 0,0225           | 0,0375           |
|                       |              |              | C16:1      |              |                  |                  |
|                       |              |              | C18        |              |                  |                  |
|                       |              |              | C18:1      | 0,25         | 0,0075           | 0,0125           |
|                       |              |              | C18:2      |              |                  |                  |
| cholesterol           | 0,35         | 0,5          |            |              |                  |                  |

**Supplementary Table S2.** Results of Flux Variability Analysis on iEG158\_mpn.

**Supplementary Table S3.** All reactions and metabolites in model iEG158\_mpn.

**Supplementary Table S4.** MCMycO serum-free medium detailed composition.

| <b>MCMycO component</b>                                         | <b>Volume</b> |
|-----------------------------------------------------------------|---------------|
| MC base                                                         | 18 mL         |
| <i>10 g Mycoplasma broth base</i>                               |               |
| <i>2.5 g glucose</i>                                            |               |
| <i>Sqp 366 mL pH 7.8</i>                                        |               |
| <i>Filter 0.45 <math>\mu</math>m and 0.22 <math>\mu</math>m</i> |               |
| <i>+ 83.3 mL yeast extract (Gibco)</i>                          |               |
| <i>+ 1.25 mL penicillin G 200000 u/mL</i>                       |               |
| <i>+ 1 mL phenol Red 1%</i>                                     |               |
| Fatty Acids Mix                                                 | 0.13 mL       |
| <i>0.3 mL palmitic acid (25 mg/mL in etOH)</i>                  |               |
| <i>0.3 mL oleic acid (30 mg/mL in etOH)</i>                     |               |
| <i>2.4 mL etOH</i>                                              |               |
| Delipidated Bovin Serum Albumin 4% (Sigma)                      | 1.67 mL       |
| Lipid Mix                                                       | 0.2 mL        |
| <i>Ethanol 300 <math>\mu</math>L</i>                            |               |
| <i>Cholesterol (10 mg/mL) 200 <math>\mu</math>L</i>             |               |
| <i>Sphingomyelin (5 mg/mL) 400 <math>\mu</math>L</i>            |               |
| <i>Phosphatidylcholine (20 mg/mL) 100 <math>\mu</math>L</i>     |               |

**Supplementary Table S5.** vB13 serum-free defined medium composition.

| Component                      | vB13     |
|--------------------------------|----------|
| CMRL-1066                      | 0.5X     |
| Glucose                        | 0.75%    |
| HEPES                          | 50mM     |
| Ampicillin                     | 100µg/ml |
| Phenol red (pH 7)              | 0.0035%  |
| Glycerol                       | 0.025%   |
| Glutamine                      | 2mM      |
| Spermine                       | 10µg/ml  |
| Phosphatidylcholine            | 40µg/ml  |
| RNA                            | 1mg/ml   |
| Yeastolate                     | 10mg/ml  |
| cholesterol                    | 30µg/ml  |
| thioctic acid                  | 0.2µg/ml |
| pyridoxamine                   | 0.5µg/ml |
| nicotinic acid                 | 0.5µg/ml |
| riboflavin                     | 0.5µg/ml |
| choline                        | 0.5µg/ml |
| sphingomyelin                  | 40µg/ml  |
| 2-Hydroxypropyl-β-cyclodextrin | 5mg/ml   |
| NaOH (pH7.7)                   |          |

**Supplementary Methods S1.** Pathway visualization maps of *M. pneumoniae* in standard oxygen condition (“baseline”), low oxygen condition (“limited oxygen”) and difference among the two (“differences”). Maps have been constructed with the tool Escher, applied on model iEG158\_mpn that was simulated in both standard oxygen condition and reduced oxygen conditions.

**Supplementary Methods S2.** Genome-scale model iEG158\_mpn of *M. pneumoniae*’s metabolism.

**Supplementary Methods S3.** Python script for simulating *in silico* the growth of *M. pneumoniae* on serum-free medium with model iEG158\_mpn.

**Supplementary Methods S4.** Query of sequences in the UNIPROT database and Position Specific Scoring Matrices used to verify the presence of lactate and acetic acid transporters and general monocarboxylic acid transporters in the *M. pneumoniae* genome.
